# Supplementary material for: Neighborhood Environment Characteristics and Control of Hypertension and Diabetes in a Primary Care Patient Sample
Source: Springer Nature journal article supplement (doi:10.1007/s11606-020-05671-y), 2020-02-10
Supplement: MOESM1 [file 17666470]

**Appendix Figures**

Appendix Figure 1. Flow Diagram of Analytical Sample

Patients of intervention study drawn for analysis at 3 Baltimore City Clinics a

(n= 33,472)

Have Baltimore City address

(n=24,884)

Have clinical observation within 2 years prior to intervention start date

(n =5,970)

Excluded (n=18, 757):

Did not have historical diagnosis of diabetes or hypertension before ReD ChiP intervention start date*

Excluded (n= 7,402):

Address was not a Baltimore City address

Excluded (n= 130):

Missing covariates b

Not missing covariates

(n =5,840)

Excluded (n=1,186):

Did not have complete address information

Have complete address information

(n=32,286)

Excluded (n= 157):

Did not have clinical observation not 2 years prior to intervention start date

Have historical diagnosis prior to intervention start date a

(n=6,127)

HTN sample c

(n= 5,325)

Diabetes sample c

(n= 2,094)

Excluded (n= 129):

Hispanic or Other Race

Black or White Race

(n =5,711)

a **Clinic specific start dates:** Clinic A: 4/19/2011; Clinic B: May 5, 2011; Clinic C: 9/9/2011

b **Covariates:** Age, Gender, Race-Ethnicity, BMI, Smoking status, Marital status, Insurance

c These samples represent complete cases for each diagnosis; Not mutually exclusive
